# Supplementary material
Source: PubMed Central journal article supplement (PMC4681474)
Supplement: DS_10.1177_0022034515598273.pdf [file DS_10.1177_0022034515598273.pdf]

# Clopidogrel Enhances Mesenchymal Stem Cell Proliferation Following Periodontitis

Journal of Dental Research  
DSI  
© International & American Associations  
for Dental Research 2015  
Reprints and permissions:  
sagepub.com/journalsPermissions.nav  
DOI: 10.1177/0022034515598273  
jdr.sagepub.com

L.S. Coimbra<sup>1</sup>, J.P. Steffens<sup>1</sup>, S. Alsadun<sup>2</sup>, M.L. Albiero<sup>2</sup>, C. Rossa Jr<sup>3</sup>,  
R.J. Pignolo<sup>4</sup>, L.C. Spolidorio<sup>1</sup>, and D.T. Graves<sup>2</sup>

## Appendix

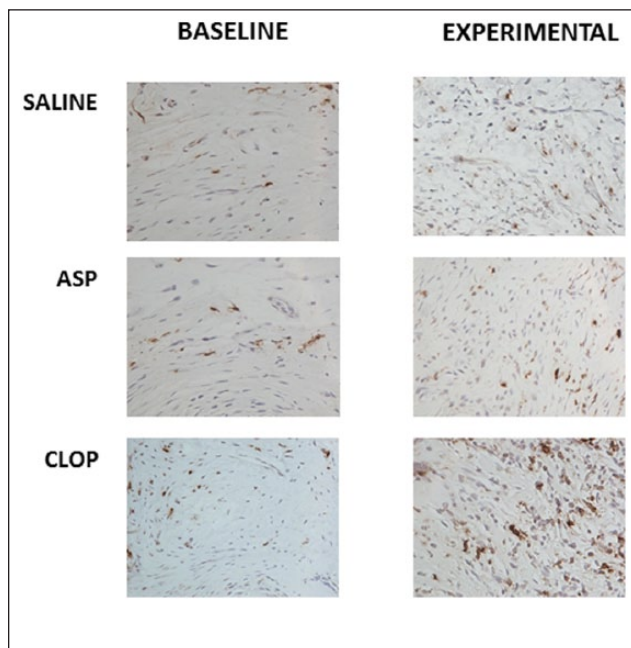

**Appendix Figure.** Expression of CD271-immunopositive mesenchymal stem cells. Rats were treated with NaCl 0.9%, aspirin (asp; 30 mg/kg), or clopidogrel (clop; 75 mg/kg) before placement of ligatures (baseline) to induce periodontitis, or rats were treated after ligatures were placed and then removed for 3 d (experimental). Immunohistochemistry was performed and images taken of the gingival connective tissue with antibody specific for CD271. Images are representative of the results observed in each group. Matched control antibody was negative. 100 × original magnification.

<sup>1</sup>Department of Physiology and Pathology, Faculdade de Odontologia de Araraquara, UNESP–Univ Estadual Paulista–Araraquara, São Paulo, Brazil

<sup>2</sup>Department of Periodontics, School of Dental Medicine, University of Pennsylvania, Philadelphia, PA, USA

<sup>3</sup>Department of Diagnosis and Surgery, Faculdade de Odontologia de Araraquara, UNESP–Univ Estadual Paulista–Araraquara, São Paulo, Brazil

<sup>4</sup>Department of Medicine and Orthopaedic Surgery, Perelman School of Medicine, University of Pennsylvania, Philadelphia, PA, USA

### Corresponding Author:

D.T. Graves, Department of Periodontics, School of Dental Medicine, University of Pennsylvania, 240 S. 40th St, Levy 122, Philadelphia, PA 19104, USA.

Email: dtgraves@dental.upenn.edu
